# Supplementary material for: The Inhibitory Effect of Quercetin on Asymmetric Dimethylarginine-Induced Apoptosis Is Mediated by the Endoplasmic Reticulum Stress Pathway in Glomerular Endothelial Cells
Source: MDPI journal article supplement (doi:10.3390/ijms15010484), 2014-01-02

## Supplementary Information

**Figure S1.** CHOP expression was observed after transfection with siCHOP. Cells were transfected with control scrambled siRNA (siCont) or siCHOP, then incubated with or without 100  $\mu$ M ADMA for 24 h. Extracts were prepared in RIPA lysis buffer and were subjected to western blotting.

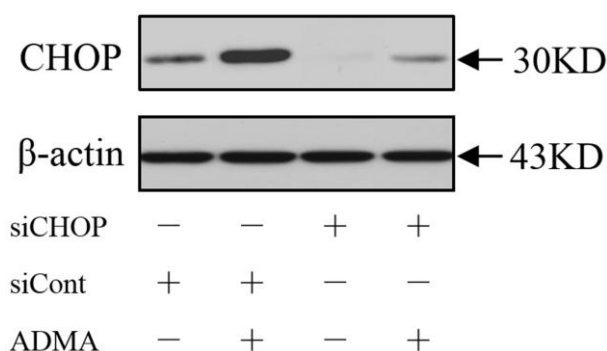

**Figure S2.** CHOP expression was observed after transfection with pcDNA3.1-GADD153. Cells were transfected with 2.5  $\mu$ g empty vector or pcDNA3.1-GADD153. Cells were collected and subjected to western blotting.

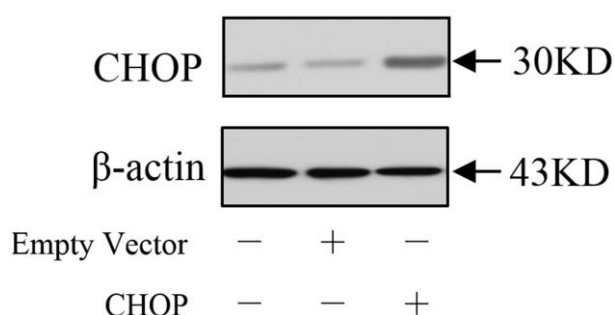

Supplement: s1 [file s1]
